# Supplementary material for: Sorting nexin 10 acting as a novel regulator of macrophage polarization mediates inflammatory response in experimental mouse colitis
Source: PubMed Central journal article supplement (PMC4746623; doi:10.1038/srep20630), 2016-02-09
Supplement: srep20630-s1.pdf [file srep20630-s1.pdf]

**Sorting nexin 10 acting as a novel regulator of macrophage polarization mediates inflammatory response in experimental mouse colitis**

**Authors:** Yan You<sup>1</sup>, Chun Zhou<sup>2</sup>, Dong Li<sup>2</sup>, Zhong-Lian Cao<sup>1</sup>, Weixing Shen<sup>3</sup>, Wan-Zhen Li<sup>2</sup>, Sulin Zhang<sup>1</sup>, Bin Hu<sup>1</sup>, Xiaoyan Shen<sup>1,2\*</sup>

**Author affiliation:**

<sup>1</sup> Department of Pharmacology, School of Pharmacy, Fudan University, Shanghai, China

<sup>2</sup> Laboratory of Pharmacology and Toxicology, School of Pharmaceutical Sciences, Sun Yat-sen University, Guangzhou, China

<sup>3</sup> The Translational Medicine Research Center, Nanjing University of Traditional Chinese Medicine, Nanjing, China

**\* Corresponding author:**

XiaoyanShen, M.D., Ph.D., Department of Pharmacology, School of Pharmaceutical Sciences, Fudan University, No. 826, Zhangheng Road, Pudong New Area, Shanghai 201203, China. Tel./fax: +86-21-51980182.

E-mail address: [shxiaoy@fudan.edu.cn](mailto:shxiaoy@fudan.edu.cn).

## Supplementary Figures and Figure legends

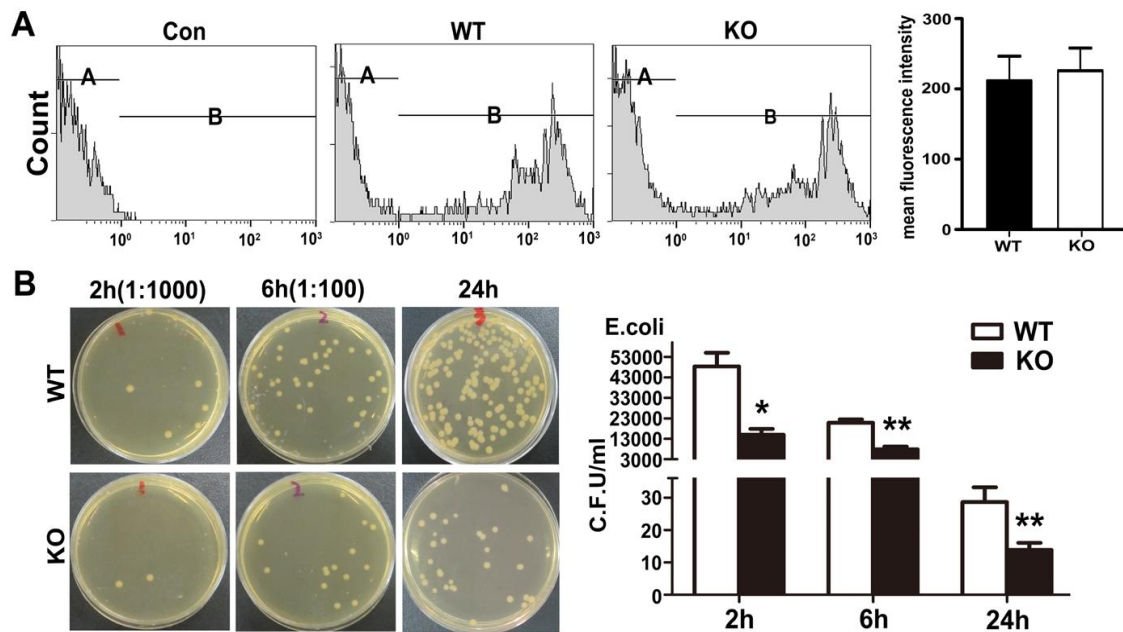

**Figure S1** SNX10 deficiency enhances bacteria killing but not phagocytosis of macrophages. (A) BMDMs from SNX10 KO or WT mice were subjected to an ex vivo phagocytosis assay against bio-particles, followed by flow cytometry analysis and quantification. (B) BMDMs from SNX10 KO or WT mice were exposed to *E. coli*, intracellular viable bacteria were quantitated by colonies after plating the lysates of the macrophages on Luria-Bertani agar. \* $P < 0.05$ , \*\*  $P < 0.01$  vs WT BMDMs.

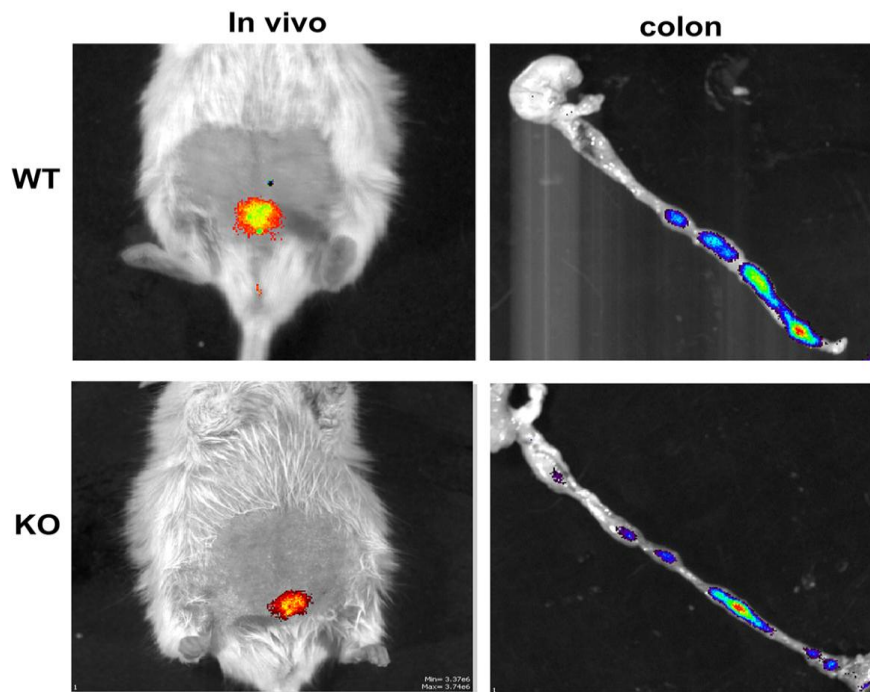

**Figure S2** Tracking of transplanted macrophages in vivo during progression of colitis. The fluorescent-labeled WT and SNX10<sup>-/-</sup> macrophages were injected via tail vein at day 3 after received clodronate- or control PBS-loaded liposomes at day 1 and 2, followed by DSS induction. Whole body bioluminescence was visualized at day 7. Representative fluorescence photographs show the transplanted macrophages migrated to the inflammatory colon.
